# Supplementary material for: Ecological Drivers of Mansonella perstans Infection in Uganda and Patterns of Co-endemicity with Lymphatic Filariasis and Malaria
Source: PLoS Negl Trop Dis. 2016 Jan 21;10(1):e0004319. doi: 10.1371/journal.pntd.0004319 (PMC4721671; doi:10.1371/journal.pntd.0004319)
Supplement: S1 Appendix — (XLS) [file pntd.0004319.s001.xls]

## Sheet: Parasitology
ID NO	SCHOOL NAME	DISTRICT	LATITUDE	LONGITUDE	Prevalance CFA %	Prevalence Mansonella perstans %	Prevalence Malaria %
1	SUBBE PS	ADJUMANI	3.29444	31.8778	1.3	0	65.9
2	AJAGORO PS	ARUA	2.96876	31.3929	4	0	38.1
3	ALIBA Arua PS	ARUA	3.11159	30.9058	0.5	0	44.7
4	GOYA PS	ARUA	3.51099	30.9816	2.2	17.4	46.1
5	ULEPPI PS	ARUA	2.78553	31.0317	0	2	45.5
6	DUFILE PS	MOYO	3.58333	31.9167	20.3	0.5	54.8
7	ALIBA Moyo PS	MOYO	3.22969	31.5501	8.8	0	24.4
8	OKUYU PS	YUMBE	3.32042	31.3443	30.7	4.1	36.1
9	PAKAYO PS	YUMBE	3.45	31.2139	29.8	1.1	48.6
10	ALALA	NEBBI	2.53333	31.4667	1.4	0	56.5
11	PAKADHA PS	NEBBI	2.3891	30.9189	0	0	24.5
12	MIN AKULLO PS	GULU	2.64722	32.3806	1.9	0	35
13	KUYWEE PS	PADER	3.13333	33.3361	17	1.1	45.5
14	OGWANGADAR PS	APAC	2.38056	32.7278	18.1	0	67.9
15	KARENGA PS	KOTIDO	3.5645	33.6951	0	0	19.2
16	KOMUKUNY PS	KOTIDO	3.52443	34.124	0	0	30.5
17	LOMODOCH PS	KOTIDO	3.56585	34.0294	0	0	18.4
18	PANYAGARA PS	KOTIDO	2.9609	34.1417	0.4	0	17.9
19	ORWAMUGE PS	KOTIDO	2.53562	33.6222	26.6	1.9	35.2
20	KALOTOM PS	MOROTO	2.45227	34.472	0.9	0	9.8
21	KANGOLE PS	MOROTO	2.43868	34.4897	2	0	33.3
22	KAPUAT PS	MOROTO	2.11513	34.2315	1.3	0	26.7
23	ACEGERETOLUM PS	NAKAPIRIPIRIT	2.0679	34.5863	0.9	2.1	7.4
24	KALAS BOYS PS	NAKAPIRIPIRIT	1.94927	34.9444	0	0	11
25	ST.MARYS PS	NAKAPIRIPIRIT	1.7872	34.5977	0	0	61.9
26	ATARI PS	SIRONKO	1.49523	34.4404	0	0	43.4
27	BUKHALU PS	SIRONKO	1.30737	34.2551	0	2.3	30.5
28	OSEERA PS	KUMI	1.57323	33.9623	8.7	0	27.8
29	ODUSAI PS	PALLISA	1.2708	33.691	2.7	0	26.5
30	LUBEMBE PS	TORORO	0.9246	33.965	0	1.3	25.4
31	POYEM PS	TORORO	0.609933	33.965	0	4.5	46.4
32	BULOOSI PS	BUSIA	0.23855	33.9453	0	0.4	51.3
33	BWIGULA PS	IGANGA	0.627167	33.6556	0	2.8	14.9
34	MASESE Co.ED. PS	JINJA	0.451133	33.225	2.4	0.8	14.9
35	BUGOODO PS	KAMULI	0.916667	33.5167	2.8	4	34.5
36	NKOONE PS	KAMULI	1.25063	33.3874	4	1.6	no data
37	GALIRAYA PS	KAYUNGA	1.34472	32.8192	0	2.9	8.8
38	KAZINGA PS	MUKONO	0.505067	32.7625	0	29.3	18.2
39	NAMANOGA PS	MUKONO	0.804883	32.7883	0	38.5	45
40	BALITTA WAKYATO PS	LUWERO	0.999999	32.2389	0	50	44.4
41	KYAMBOGO PS	LUWERO	1.08363	32.0341	0	7.6	23.9
42	KISAALIZI PS	NAKASONGOLA	1.53617	32.4333	0	3.6	12.7
43	BUKWIRI PS	KIBOGA	1.13907	31.6	0	24.5	32.5
44	KALWANGA PS	MPIGI	0.124217	31.7726	0	1	33
45	LUSALIRA PS	MUBENDE	0.30923	31.8434	0	0.4	40.6
46	BUKAKATA PS	MASAKA	-0.29862	32.0054	0	9.3	75.5
47	KAYONZA PS	RAKAI	-0.69129	31.3613	0	1.1	65.7
48	MATENGEETO PS	RAKAI	-0.85702	31.5069	0	23.5	61.7
49	BUGOMA PS	KALANGALA	-0.263889	32.0833	0	0	26.3
50	LULAMBA PS	KALANGALA	-0.194444	32.3333	0	1	22
51	RWOBUZIIZI PS	MBARARA	-0.133313	30.5167	0	0.4	19.6
52	RWEIZIRINGO PS	MBARARA	-0.67375	30.6845	0	0	34.4
53	MUREMA PS	MBARARA	-0.96645	30.9698	0	0	22
54	KITWE MIXED PS	NTUNGAMO	-0.983153	30.4833	0	0.4	60.2
55	BUFUKA PS	KABALE	-1.26667	29.9333	0	0	7.4
56	CHIHE PS	KISORO	-1.2591	29.6823	0	0	11.5
57	KIBIMBIRI PS	KANUNGU	-0.716538	29.7	0	4.7	26.9
58	RUGYEYO PS	KANUNGU	-0.9	29.8333	0	0	32.5
59	RUTAKA PS	BUSHENYI	-0.35937	30.047	0	0.8	57.6
60	KATOJO PS	KASESE	-0.018417	29.7748	0	9.3	21.4
61	BUKURUNGO PS	KAMWENGE	-0.033333	30.2583	0	3.7	57.6
62	KAKOOGA PS	KABAROLE	0.475	30.15	0	3.5	49.4
63	NTANDI PS	BUNDIBUGYO	0.816666	30.1167	6.1	72.8	46.3
64	BUNGOMA PS	HOIMA	1.23333	30.8333	0.4	40.5	54.1
65	BUTIABA PS	MASINDI	1.81866	31.3254	0	0	8.3
66	KILANYI PS	MASINDI	1.78167	31.7123	0	4	46
67	KINYONGA PS	MASINDI	1.96667	31.7167	0.8	2.2	29.6
68	LUBIRI PS	KIBALE	0.988533	30.5849	0.4	30	45.4
69	KAMWEZI PS	KABALE	-1.22563	30.2194	0	0	20.2
70	NAMUTAMBA	MUBENDE	0.4963	32.081	0	5	17.8
71	KINONI PS	NAKASONGOLA	1.1458	32.3866	0	3	31.3
72	IGOTI PS	APAC	1.76667	32.1797	11.1	1.1	62.8
73	AWIMON PS	KABERAMAIDO	1.88333	33.275	13	2.4	22.2
74	ABERAN PS	KATAKWI	2.20833	33.6167	24.9	4.7	52
75	ALEBTONG PS	LIRA	2.26667	33.25	21.5	5	20.8
76	KAPTUM PS	KAPCHORWA	1.41667	34.5833	0	0	16.3

## Sheet: Environmental
Parameter	Description	Spatial Resolution	Temporal resolution	Period	Source
NDVI		250m	wet season composite	2000-2003	MODIS
NDVI		250m	dry season composite	2000-2003	MODIS
NDVI		250m	annual composite	2000-2003	MODIS
LST day		1km	wet season composite	2000-2003	MODIS
LST day		1km	dry season composite	2000-2003	MODIS
LST day		1km	annual composite	2000-2003	MODIS
LST night		1km	wet season composite	2000-2003	MODIS
LST night		1km	dry season composite	2000-2003	MODIS
LST night		1km	annual composite	2000-2003	MODIS
LST difference (LST day minus LST night)		1km	annual, wet season and dry season composites	2000-2003	MODIS
Land cover		30m		1996	National Biomass Study
Landcover (MODIS)		1km		2000-2003	MODIS
Water bodies (distance)		30m		1996	National Biomass Study
Elevation		90m			SRTHM shuttlemission
PRE = Precipitation	Rainfall, average based on wet season, dry season and annual months	5km	annual, wet season and dry season composites	1961-1991	Almanac Characterization Tool vs 3.0
PPE= PRE/PET	The ratio of rain/potential evapotranspiration (PPE). Index that represents not just amount of rainfall, but the availability of water in a given period. If the growing period is not limited by temperature, the ratio of PRE/PET determines the start, end and type of growing period	5km	annual, wet season and dry season composites	30 year long term average	Almanac Characterization Tool vs 3.0
KINGS COLLEGE DATA		1km
wprec - wind driven precipitation inputs (mm/year)	The wind-driven rainfall represent rainfall reaching the ground and is modelled on the basis of 1km gridded TRMM rainfall, wind speed and direction and terrain conditions (slope, aspect and topographic exposure)	1km			Kings college
allf - current tropical forest fractional cover (%) (called ForestFracCov		1km		for the last 50 yrs	Kings college
forloss - fractional forest cover loss to date (%)		1km		Change over 50 yrs	Kings college
annbal - annual water balance (ftpserver not connecting)		1km		50yrs average	Kings college
sensluc - hydrological sensitivity to land use change	(change in water balance per unit change in land cover fraction) (mm/%)	1km	cant use: to many noData cells		Kings college
Change in tree cover percentage from 2000-2005					MODIS Vegetation Continuous Fields tree cover product (Collection 4, release 3) (Kings college9
TALA Oxford data: Temporal fourier processed AVHRR data				1982 – 1999
NDVI	correlated with soil moisture, rainfall and veg biomass, coverage and productivity	1km		1983 – 1999
LST		1km		1986 – 1999
MIR (Middle Infrared Reflection)	correlated with the water content, surface, temp and structure of veg. Canopies	1km
UNEP-GRID Population for Africa	Persons/km2	2.5 minutes
UNEP-GRID Population for Africa	persons	2.5 minutes
IGAD data:
ugactd1t0403m = predicted cattel dens	Predicted cattle density for Africa (2004), corrected for unsuitability, adjusted to match observed totals	0.05 dg		Global livestock distributions AGAL/ERGO 2004		C:\Uganda_dbase\Agriculture\Livestock	Livestock
uga2000lgp =Lenght of growing period	LGP is defined as the period during the year when prevailing temperatures are conducive to crop growth (Tmean>-5C)and precipitation + moisture stored in the soil profile exceed half the PET.	0.008	days	ILRI (Phil) 2000	Africa IDRISI image coverted to grid and clipped for Uganda
mkt2_cost_ll = Cost distance to local markets	Cost distance raster (travel time in hours) to local markets (populated places with more than 50.000 people).	0.008	travel time hrs	IFPRI 2002	Continuous data layer produced by Claudia based on IFPRI input data and model. Map available also in UTM projection (mkt2_cost_utm).	C:\Uganda_dbase\Accessibility	Accessibility
